# Supplementary material for: Synthesis, crystal structure, and antiviral evaluation of new imidazopyridine-schiff base derivatives: in vitro and in silico anti-HIV studies
Source: Royal Society of Chemistry journal article supplement (doi:10.1039/d4ra07561g), 2024-01-01
Supplement: d4ra07561g1.pdf [file d4ra07561g1.pdf]

## ***Supplementary file***

Synthesis, crystal structure, and antiviral evaluation of new imidazopyridine-schiff base derivatives: *in vitro* and *in silico* anti-HIV studies

Mohamed Azzouzi<sup>1\*</sup>, Abderrahim Ait Ouchaoui<sup>2</sup>, Omar Azougagh<sup>1</sup>, Salah Eddine El Hadad<sup>2</sup>, Mohamed Abou-salama<sup>1</sup>, Adyl Oussaid<sup>1</sup>, Christophe Pannecouque<sup>3</sup>, Taoufik Rohand<sup>1\*</sup>

<sup>1</sup>Laboratory of Molecular Chemistry, Materials and Environment (LCM2E), Department of Chemistry, Multidisciplinary Faculty of Nador, University Mohamed I, 60700 Nador, Morocco.

<sup>2</sup>Chemical and Biochemical Sciences-Green Process Engineering, University Mohammed VI Polytechnic, Ben Guerir, Morocco.

<sup>3</sup>Rega Institute for Medical Research, Laboratory of Virology and Chemotherapy, K.U. Leuven, Leuven, B-3000, Belgium.

\*Corresponding authors: M. Azzouzi ( [azzouzi.mohamed@ump.ac.ma](mailto:azzouzi.mohamed@ump.ac.ma) ) and T. Rohand ( [t.rohand@ump.ac.ma](mailto:t.rohand@ump.ac.ma) )

**<sup>1</sup>H-NMR , <sup>13</sup>C-NMR and LC-MS(ESI<sup>+</sup>) of  
(E)-6-chloro-N-(4-nitrobenzylidene)-2-phenylimidazo[1,2-a]pyridin-3-amine (4a)**

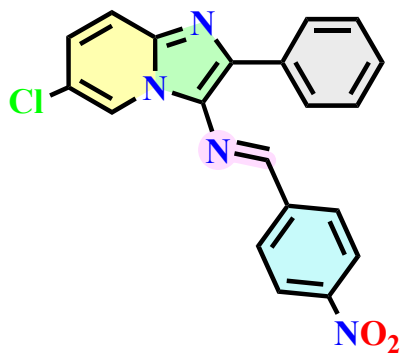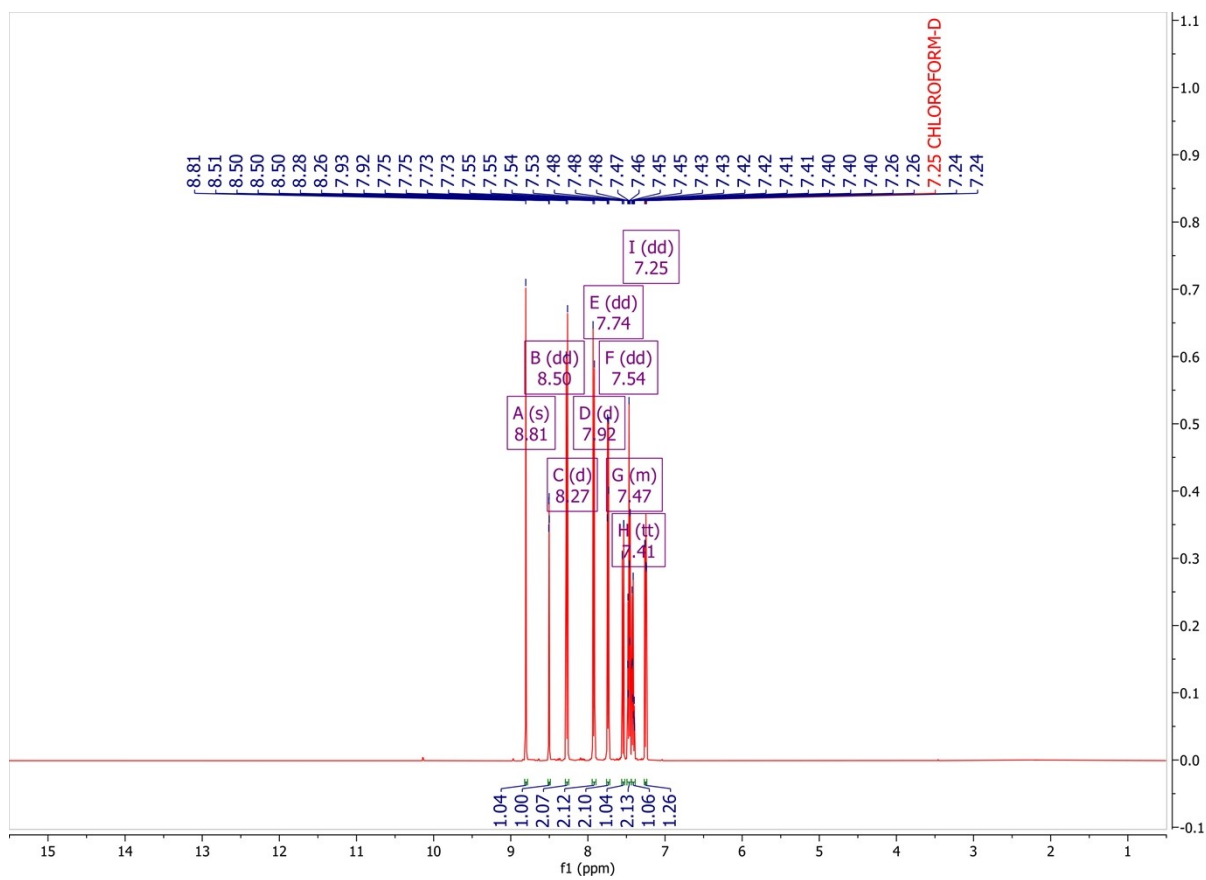

Figure S1. <sup>1</sup>H NMR spectra of (4a)

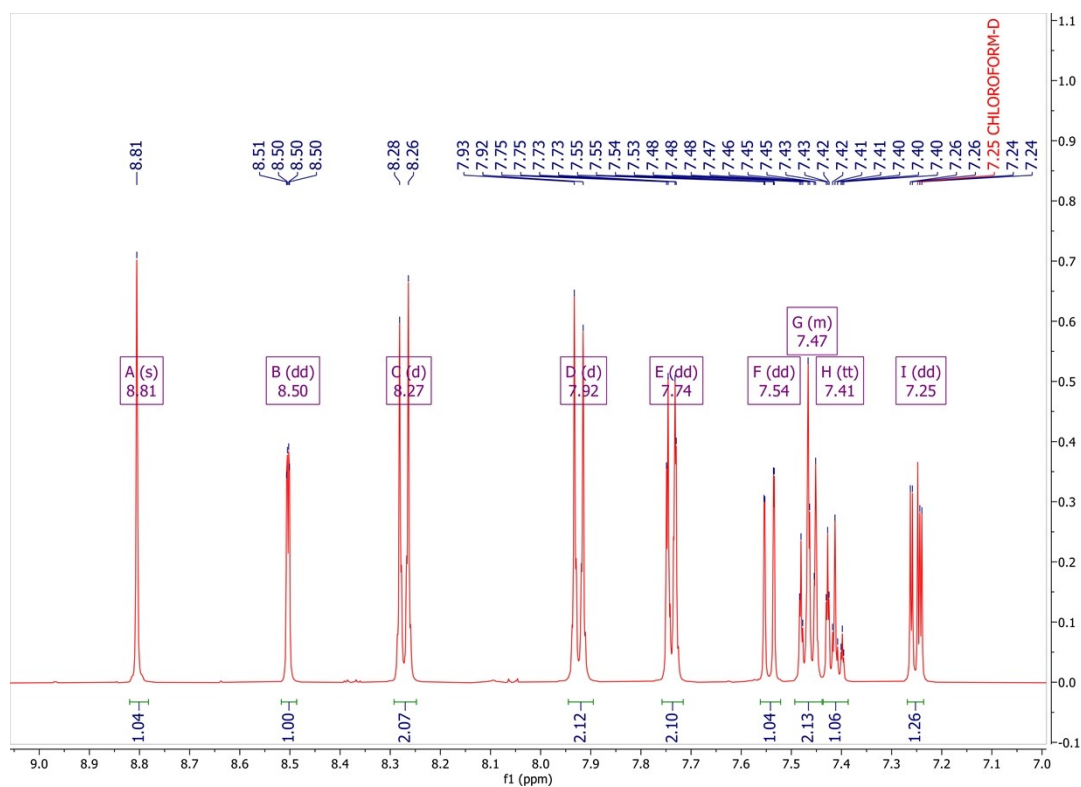

Figure S2.  $^1\text{H}$  NMR spectra (9-7 ppm) of (4a)

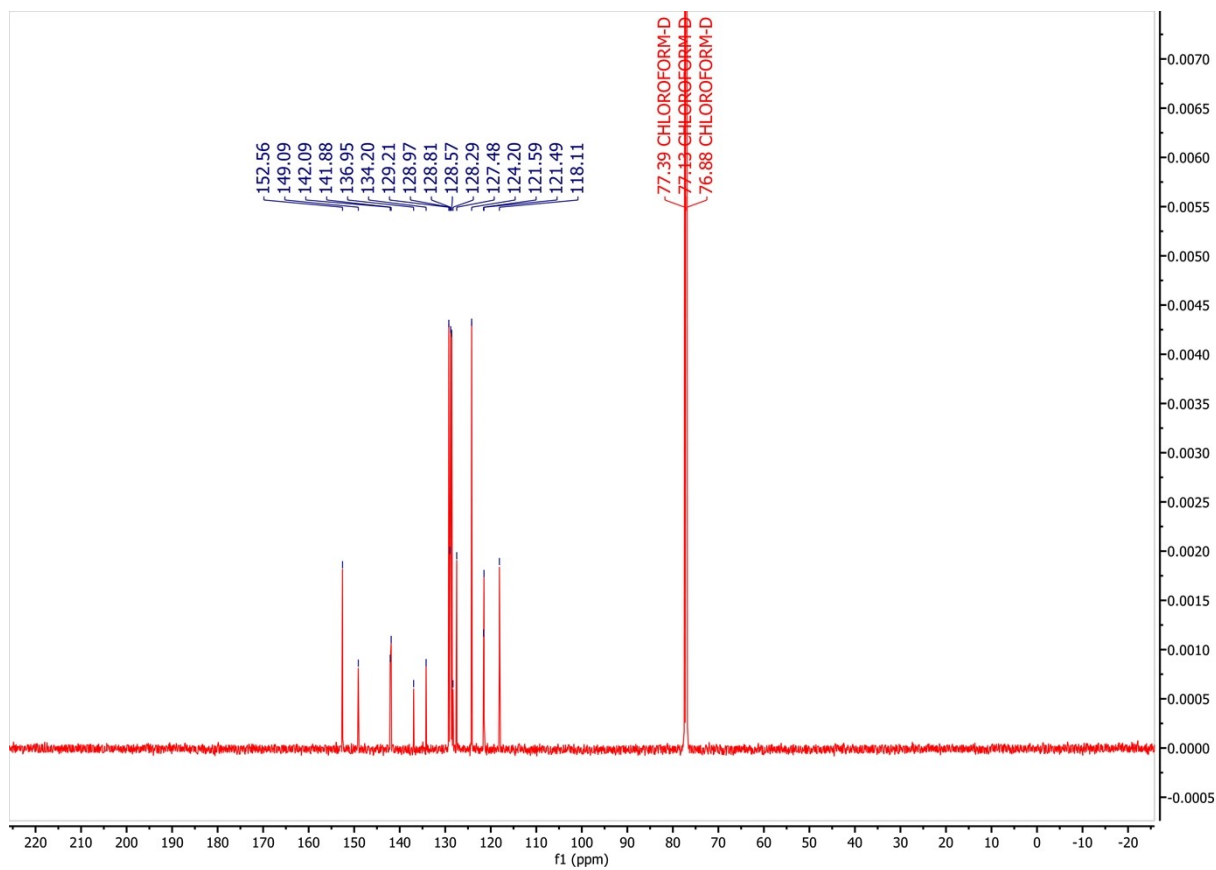

Figure S3.  $^{13}\text{C}$  NMR spectra of (4a)

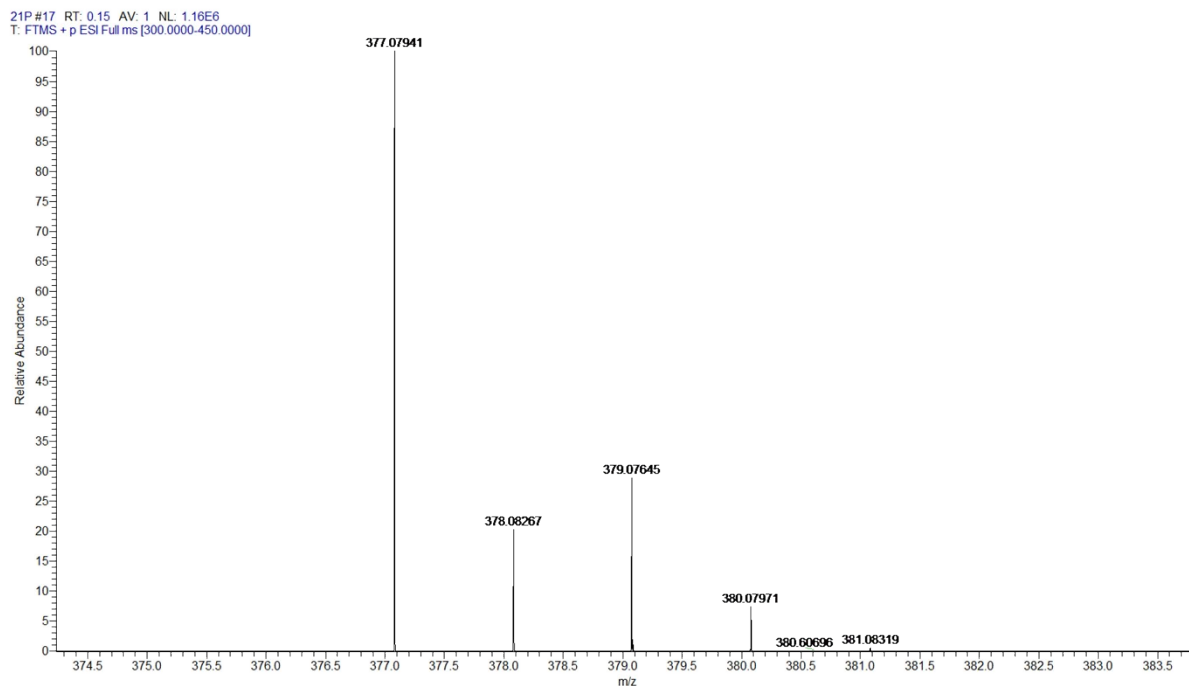

Figure S4. ESI<sup>+</sup>-MS spectra of (4a)

<sup>1</sup>H-NMR , <sup>13</sup>C-NMR and LC-MS(ESI<sup>+</sup>) of  
(E)-6-chloro-N-(3-nitrobenzylidene)-2-phenylimidazo[1,2-a]pyridin-3-amine (4b)

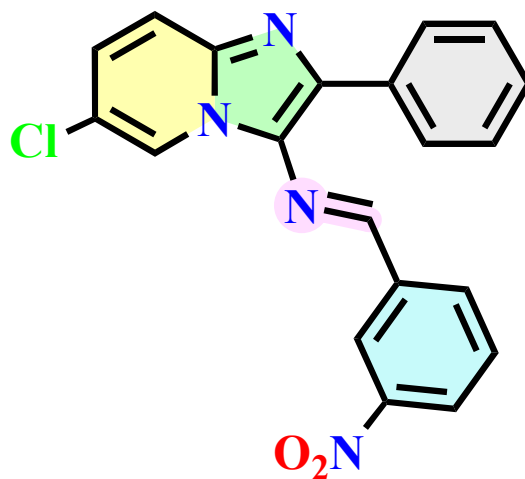

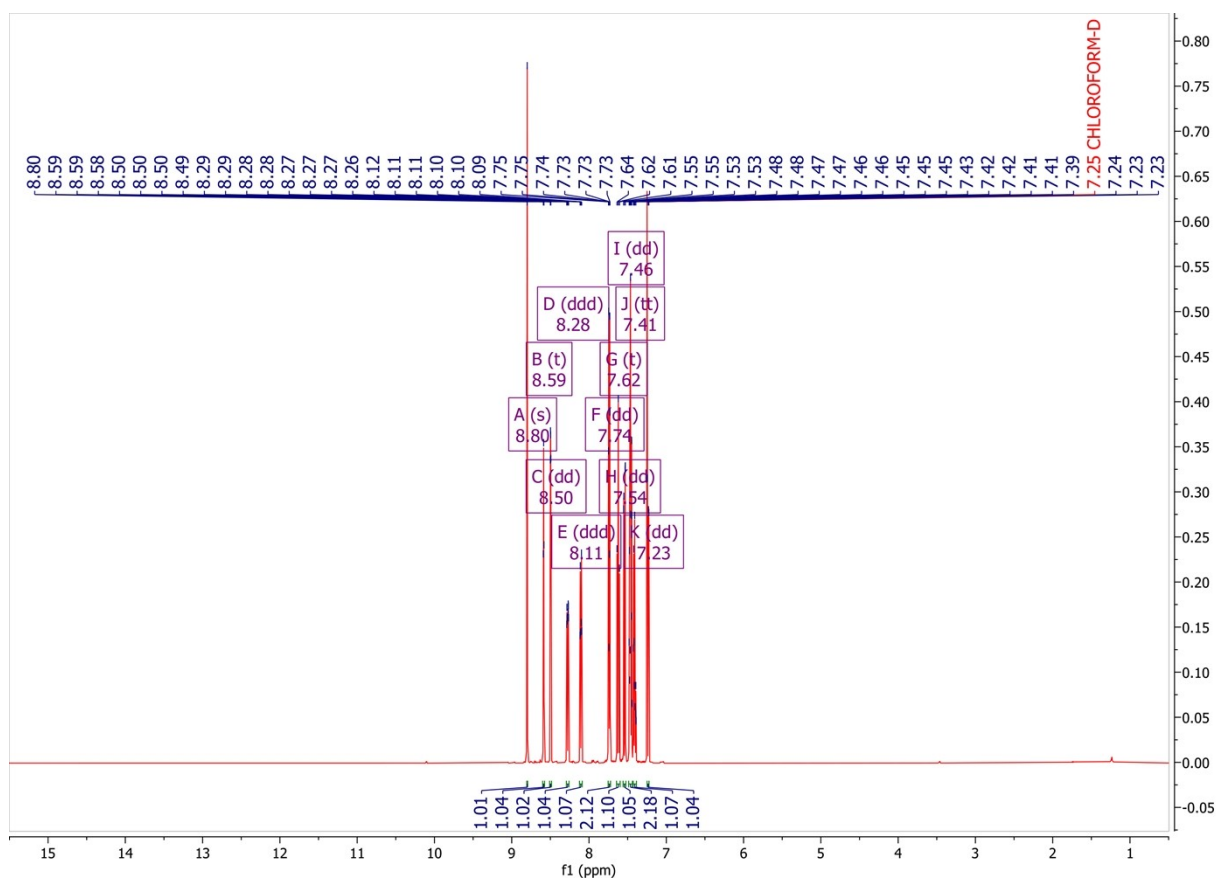

Figure S5.  $^1\text{H}$  NMR spectra of (4b)

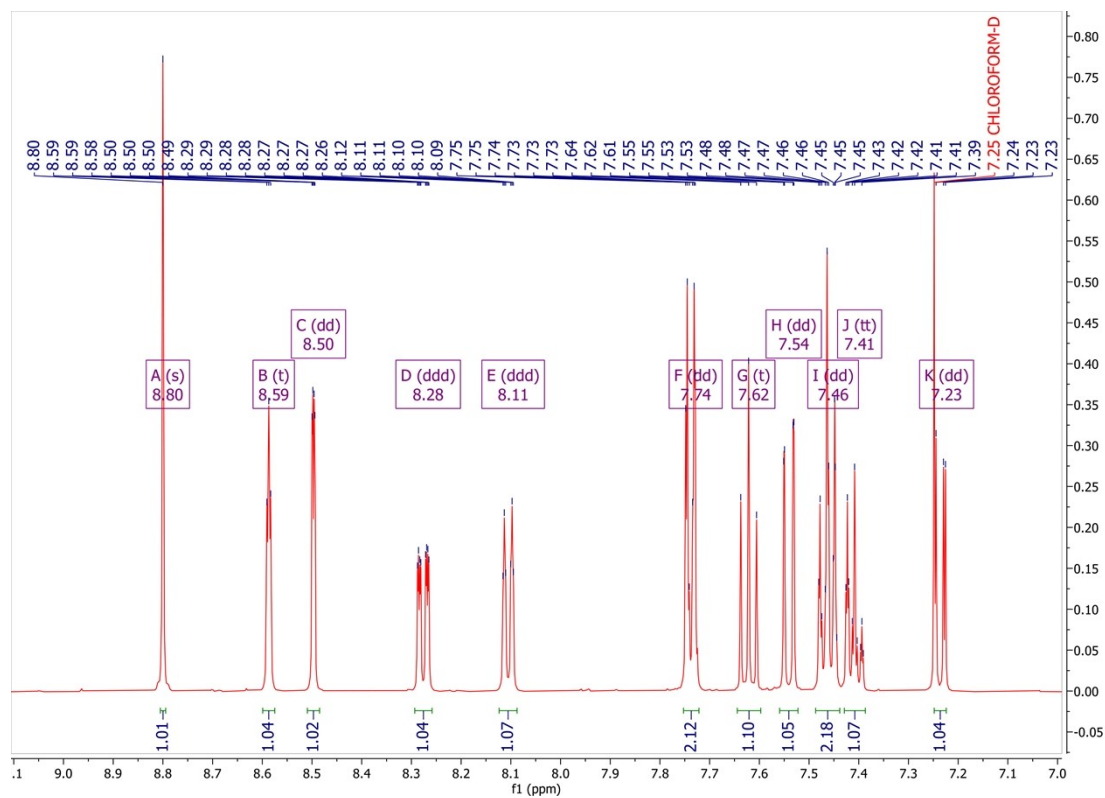

Figure S6.  $^1\text{H}$  NMR spectra (9-7 ppm) of (4b)

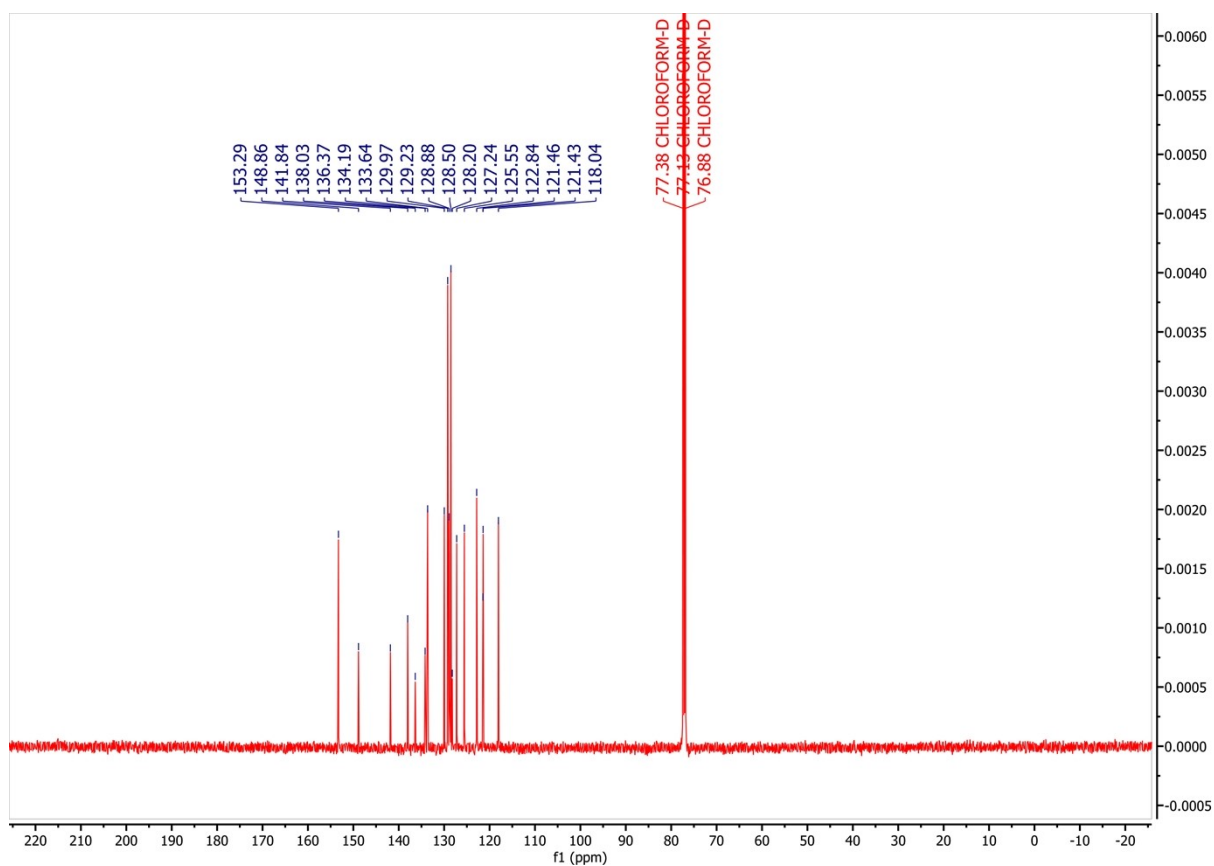

Figure S7. <sup>13</sup>C NMR spectra of **(4b)**

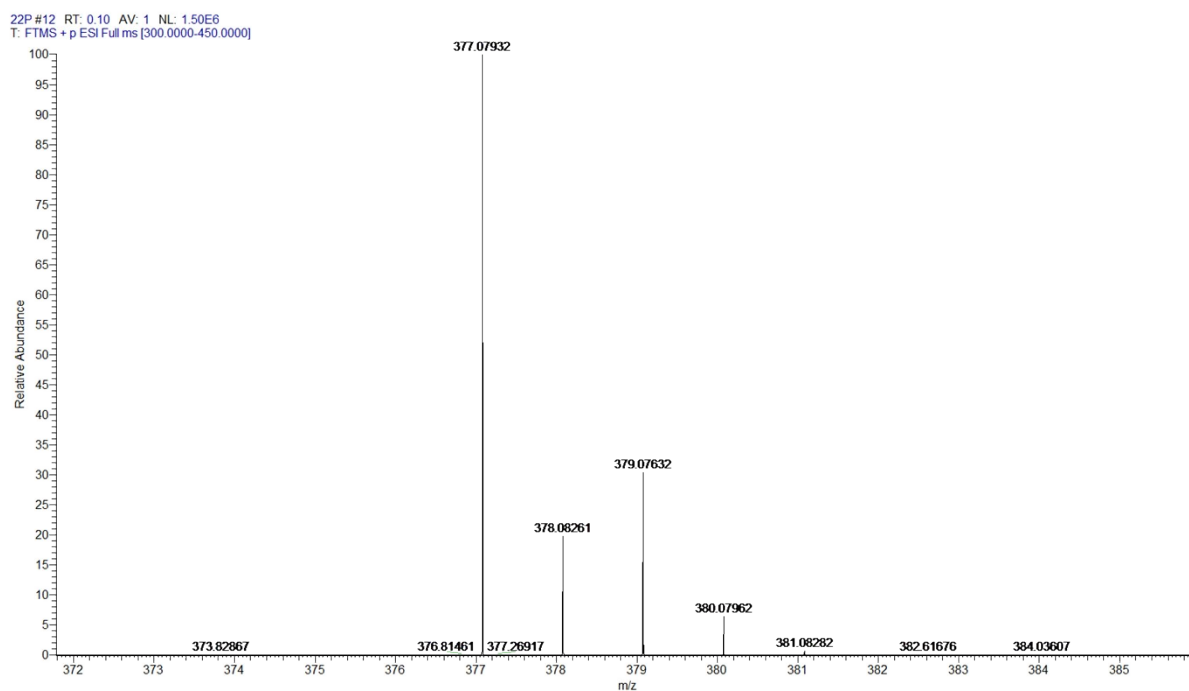

Figure S8. ESI<sup>+</sup>-MS spectra of **(4b)**

**<sup>1</sup>H-NMR , <sup>13</sup>C-NMR and LC-MS(ESI<sup>+</sup>) of  
(E)-6-chloro-N-(2-nitrobenzylidene)-2-phenylimidazo[1,2-a]pyridin-3-amine (4c)**

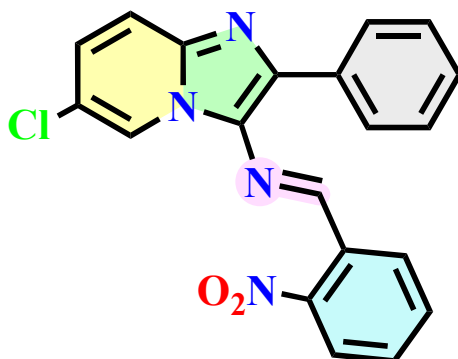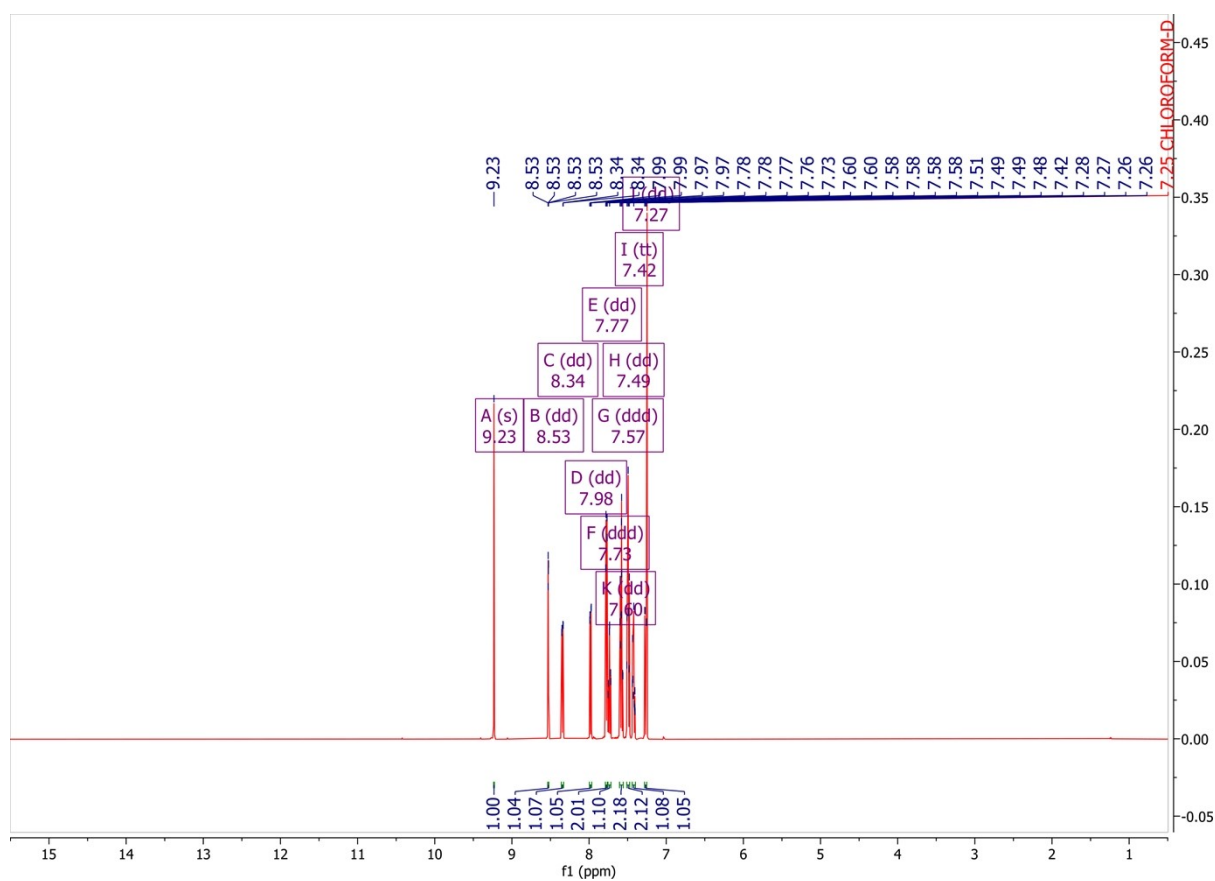

Figure S9. <sup>1</sup>H NMR spectra of (4c)

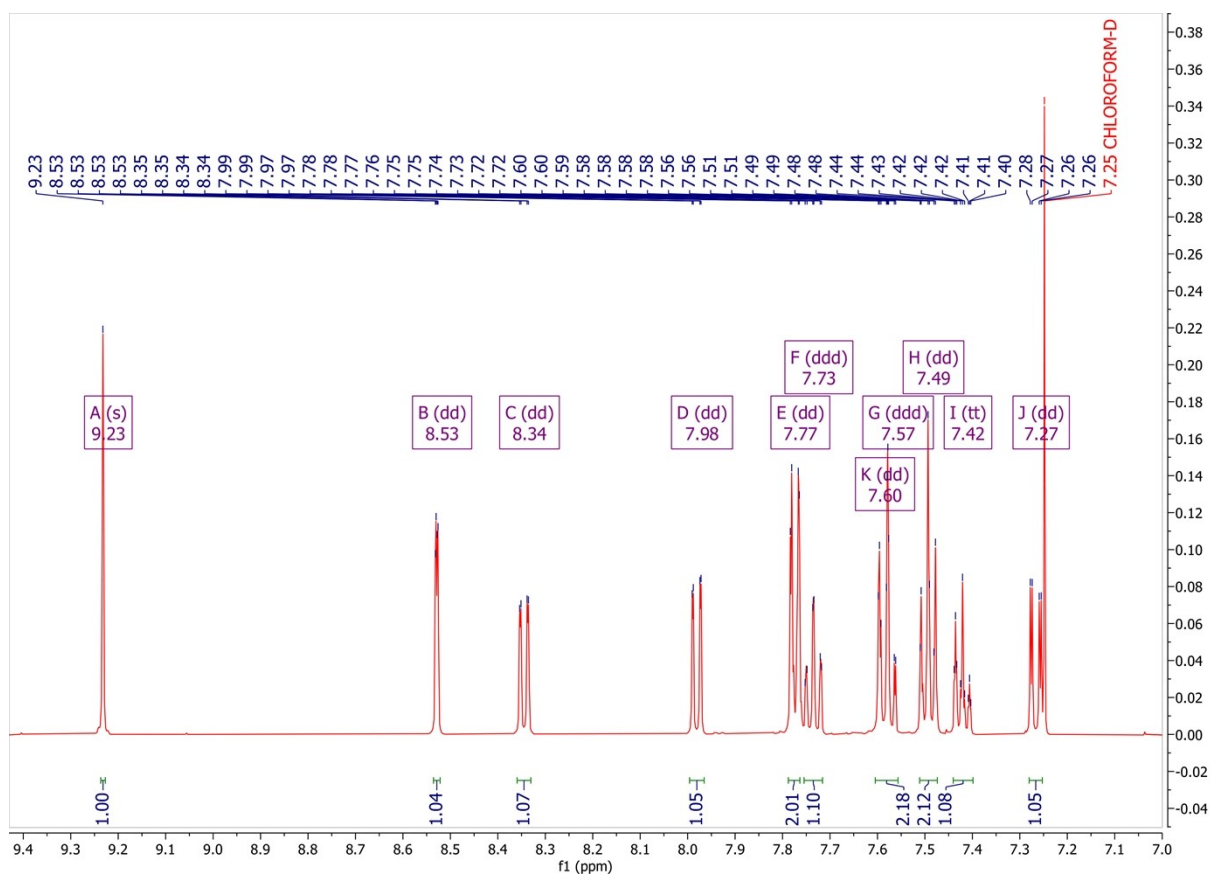

Figure S10.  $^1\text{H}$  NMR spectra (9-7 ppm) of (**4c**)

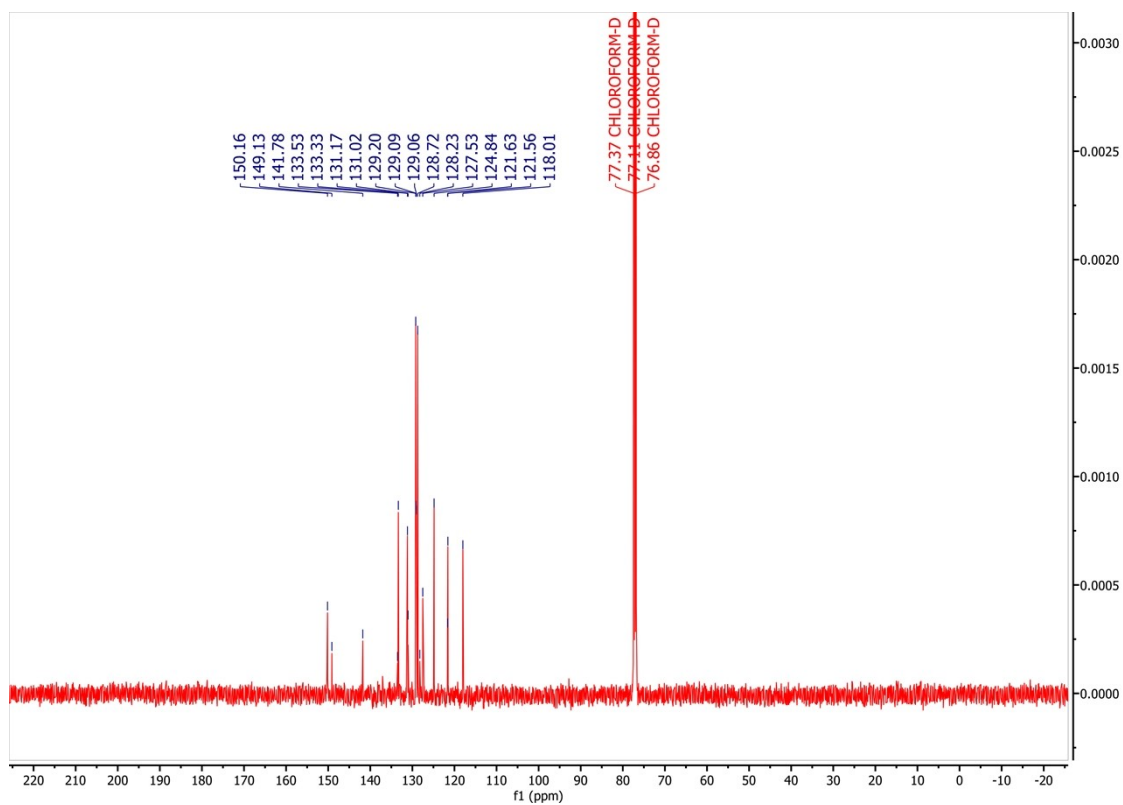

Figure S11.  $^{13}\text{C}$  NMR spectra of (**4c**)



23 #7 RT: 0.06 AV: 1 NL: 6.50E6  
T: FTMS + p ESI Full ms [300.0000-450.0000]

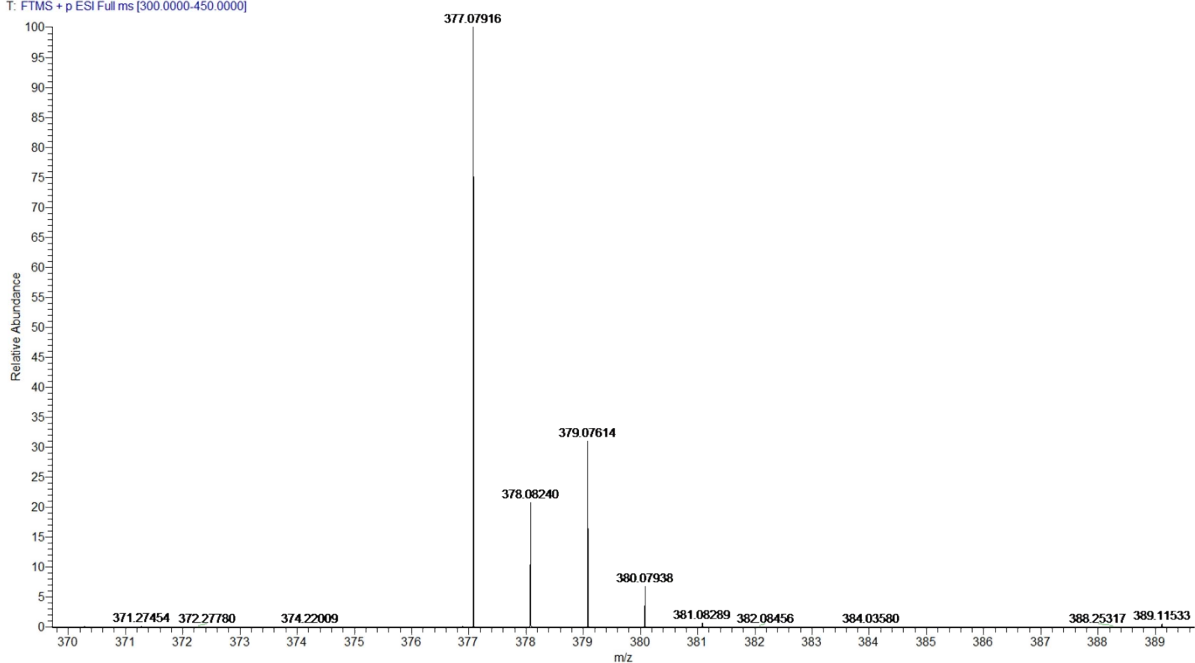

Figure S12. ESI<sup>+</sup>-MS spectra of (4c)

**<sup>1</sup>H-NMR , <sup>13</sup>C-NMR and LC-MS(ESI<sup>+</sup>) of  
(E)-2-(((6-chloro-2-phenylimidazo[1,2-a]pyridin-3-yl)imino)methyl)phenol (4d)**

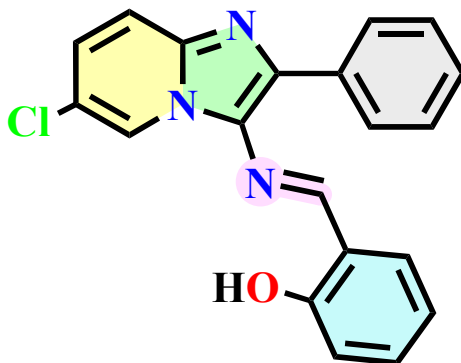

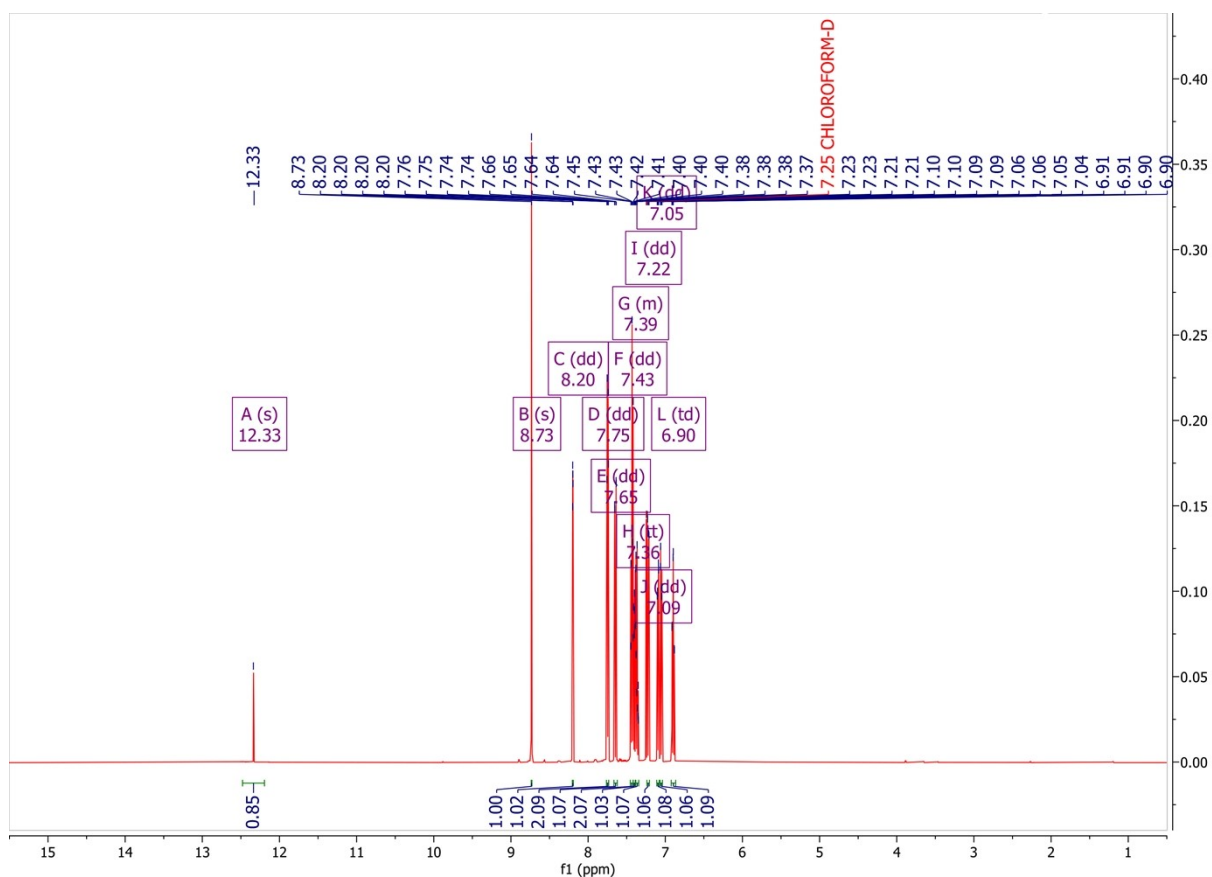

Figure S13.  $^1\text{H}$  NMR spectra of **(4d)**

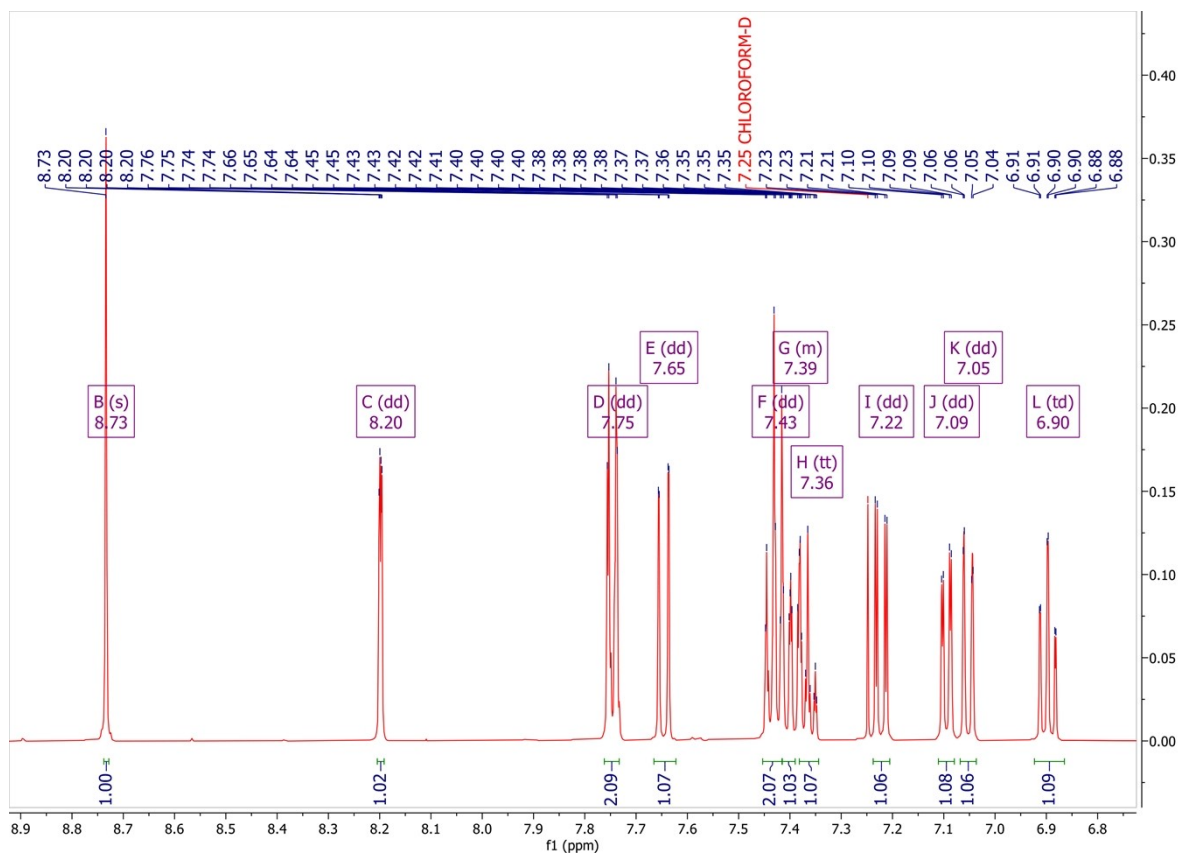

Figure S14.  $^1\text{H}$  NMR spectra ( 9-7 ppm) of (**4d**)

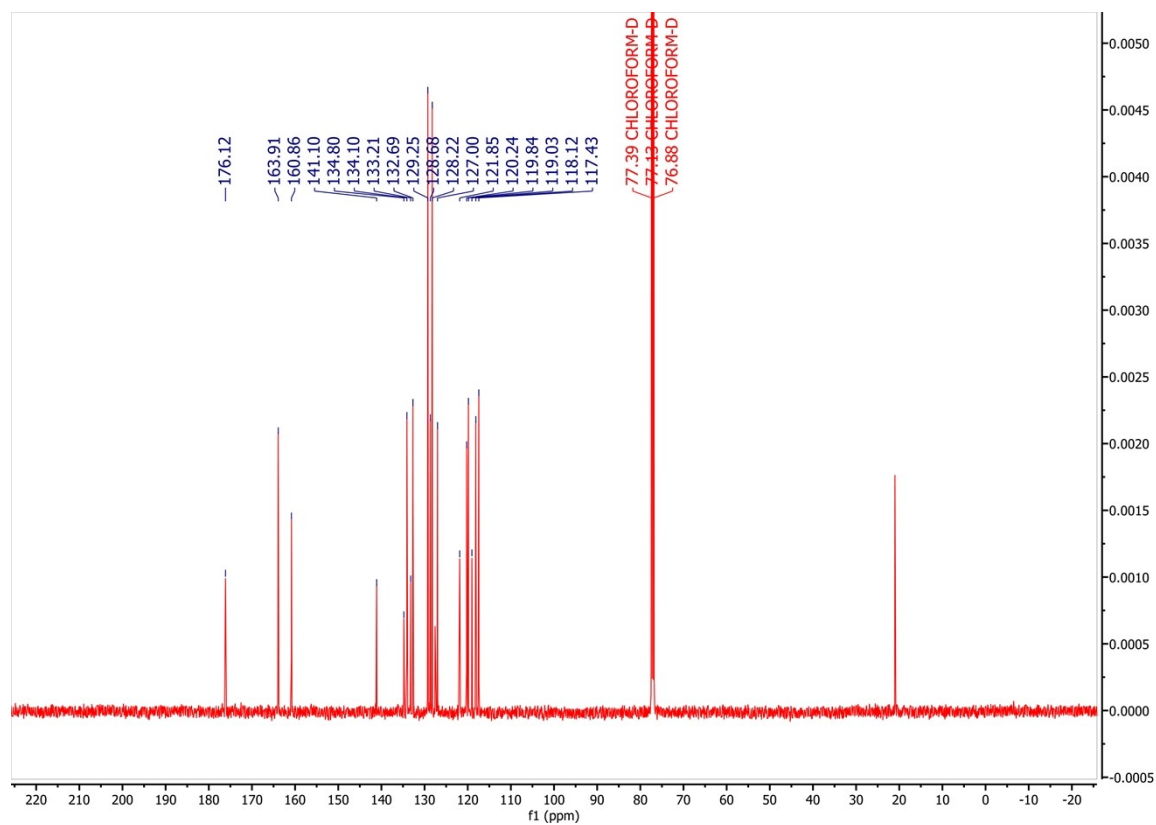

Figure S15.  $^{13}\text{C}$  NMR spectra of (**4d**)

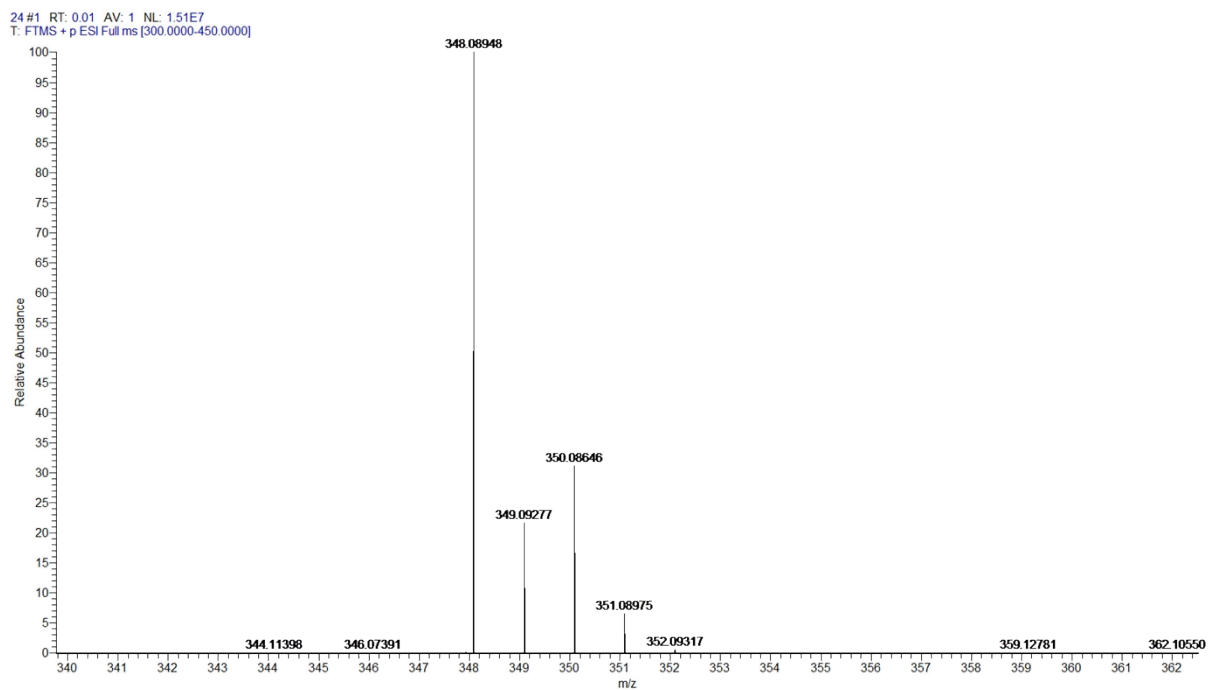

Figure S16. ESI<sup>+</sup>-MS spectra of (**4d**)
